# Supplementary material for: Probing into the In-Situ Exsolution Mechanism of Metal Nanoparticles from Doped Ceria Host
Source: MDPI journal article supplement (doi:10.3390/nano11082114), 2021-08-19
Supplement: s1 [file s1]

# Probing into the In-Situ Exsolution Mechanism of Metal Nanoparticles from Doped Ceria Host

Lifang Zhang <sup>1</sup>, Weiwei Ji <sup>1</sup>, Qiyang Guo <sup>1</sup>, Yu Cheng <sup>1,\*</sup>, Xiaojuan Liu <sup>2,3</sup>, Hongbin Lu <sup>1,\*</sup> and Hong Dai <sup>1,\*</sup>

<sup>1</sup> School of Chemistry and Chemical Engineering, Nantong University, Nantong 226009, China; lfzhang@ntu.edu.cn (L.Z.); 1808041069@stmail.ntu.edu.cn (W.J.); gyguo@ntu.edu.cn (Q.G.)

<sup>2</sup> State Key Laboratory of Rare Earth Resource Utilization, Changchun Institute of Applied Chemistry, Chinese Academy of Sciences, Changchun 130022, China; lxjuan@caic.ac.cn

<sup>3</sup> University of Science and Technology of China, Hefei 230026, China

\* Correspondence: chengyu@ntu.edu.cn (Y.C.); luhb@nju.edu.cn (H.L.); dh123@ntu.edu.cn (H.D.)

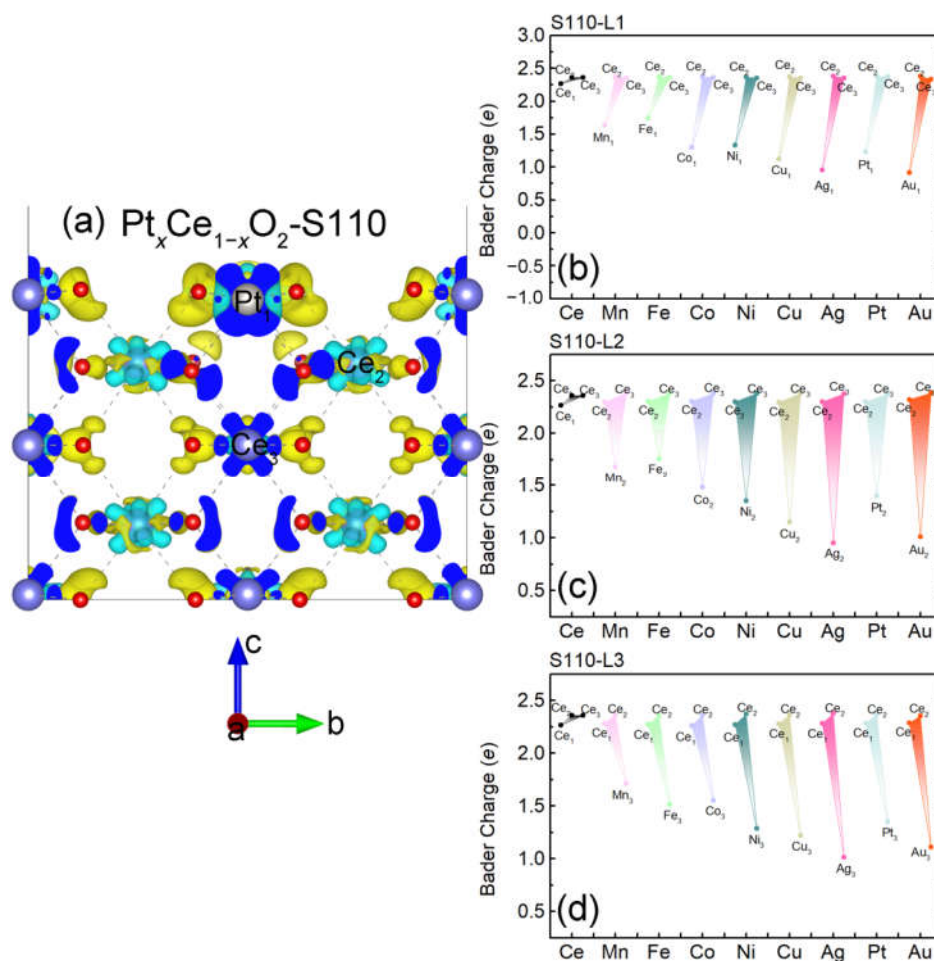

**Figure S1.** (a) The 3D-plot of charge density difference with an isosurface value of  $0.02 e/\text{Bohr}^3$  for  $\text{Pt}_x\text{Ce}_{1-x}\text{O}_2\text{-S110}$  with Pt at L1. (b–d) Evolution of Bader charge for  $\text{M}_x\text{Ce}_{1-x}\text{O}_2\text{-S110}$  with the dependence of Mn, Fe, Co, Ni, Cu, Ag, Pt and Au: (b) M in L1, (c) M in L2 and (d) M in L3.

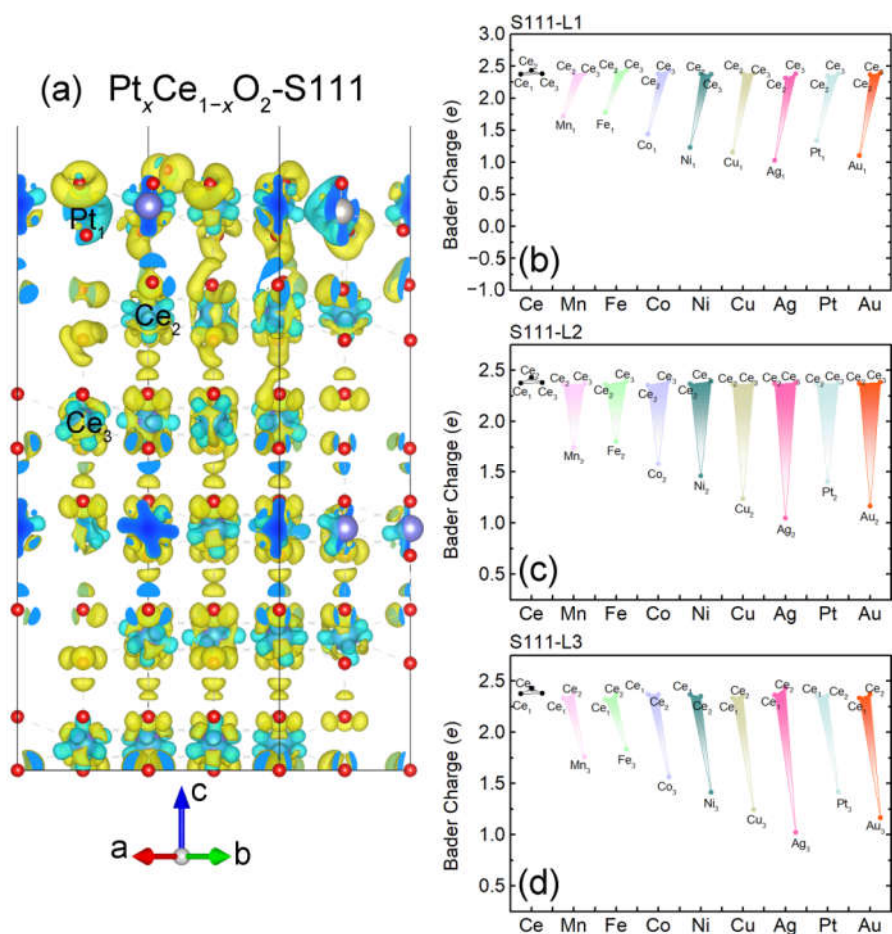

**Figure S2.** (a) The 3D-plot of charge density difference with an isosurface value of  $0.02 e/\text{Bohr}^3$  for  $\text{Pt}_x\text{Ce}_{1-x}\text{O}_2\text{-S111}$  with Pt at L1. (b–d) Evolution of Bader charge for  $\text{M}_x\text{Ce}_{1-x}\text{O}_2\text{-S111}$  with the dependence of Mn, Fe, Co, Ni, Cu, Ag, Pt and Au: (b) M in L1, (c) M in L2 and (d) M in L3.

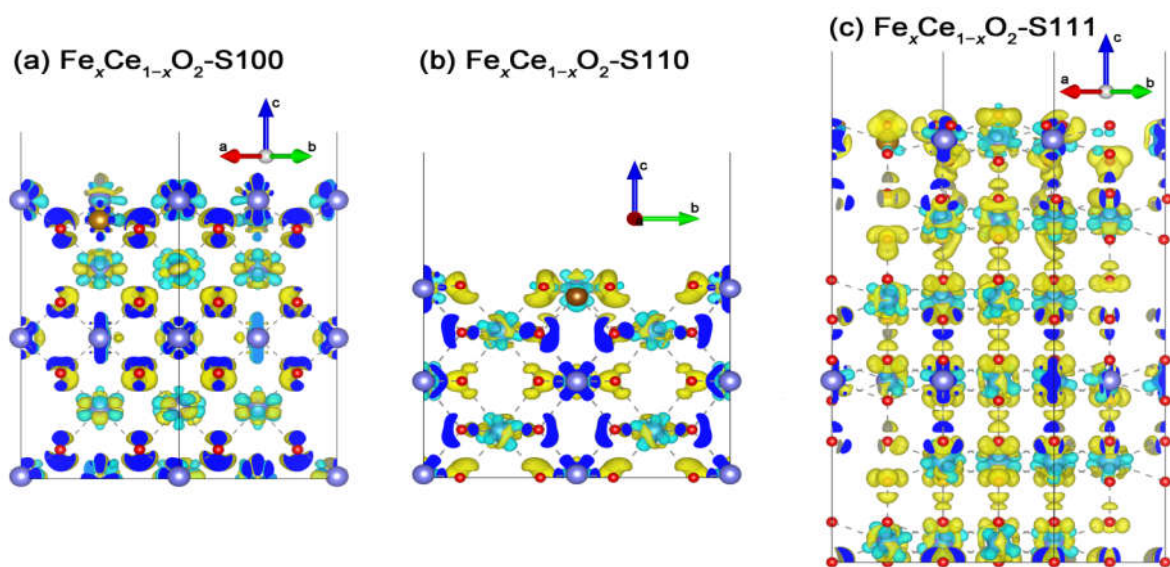

**Figure S3.** The 3D plots of charge density difference with an isosurface value of  $0.02 e/\text{Bohr}^3$  for  $\text{Fe}_x\text{Ce}_{1-x}\text{O}_2$  with different oriented surfaces: (a)  $\text{Fe}_x\text{Ce}_{1-x}\text{O}_2\text{-S100}$ , (b) for  $\text{Fe}_x\text{Ce}_{1-x}\text{O}_2\text{-S110}$  and (c)  $\text{Fe}_x\text{Ce}_{1-x}\text{O}_2\text{-S111}$ .

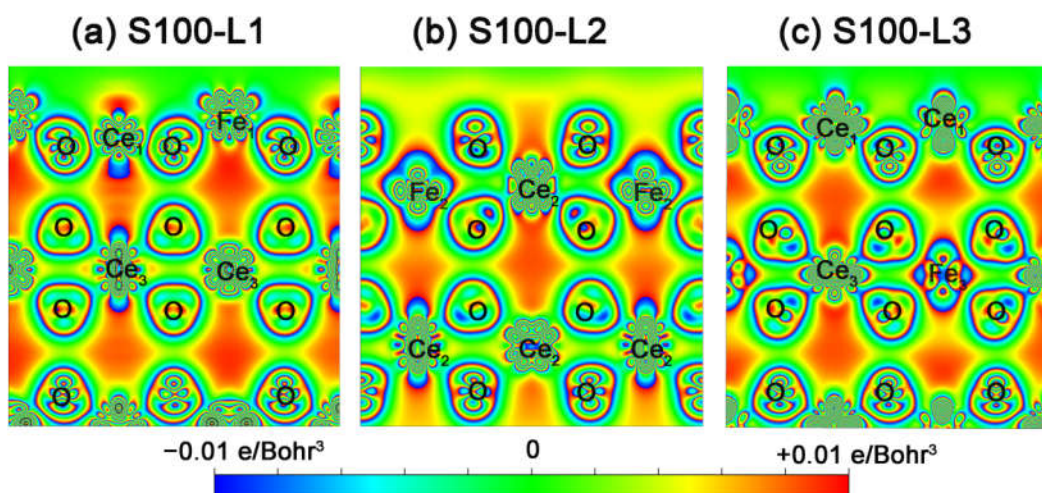

**Figure S4.** 2-D charge density difference plots along the (001)-direction ( $\Delta n(r)$  in units of  $e/\text{Bohr}^3$ ) for  $1.5 \times 1.5 \times 1 \text{ Fe}_x\text{Ce}_{1-x}\text{O}_2$ -S100, which with Fe (a) on surface layer L1, (b) in second layer L2 and (c) in the 'bulk' layer L3.
